# Supplementary material
Source: MDPI journal article supplement (https://www.mdpi.com/2225-1154/10/10/144)
Supplement: s1 [file s1]

Archive with 1 entries (1 files):
- climate-1920202-supplementary.pdf
