# Supplementary material
Source: MDPI journal article supplement (https://www.mdpi.com/2225-1154/10/10/144)
Supplement: s1 [file s1 › climate-1920202-supplementary.pdf]

# Temporal and spatial variability of dryness conditions in Kazakhstan during 1979-2021 based on reanalysis data

Irina Zheleznova <sup>1</sup>, Daria Gushchina <sup>1</sup>, Zhiger Meiramov <sup>2</sup> and Alexander Olchev <sup>1,\*</sup>

<sup>1</sup> Department of Meteorology and Climatology, Faculty of Geography, Lomonosov Moscow State University, GSP-1, Leninskie Gory 1, 119991 Moscow, Russia

<sup>2</sup> Department of Ecology and Nature Management, Kazakhstan Branch of Lomonosov Moscow State University, st. Kazhymukan, 11, Nur-Sultan 010010, Kazakhstan

\* Correspondence: aoltche@yandex.ru or aoltche@gmail.com

## Supplementary materials

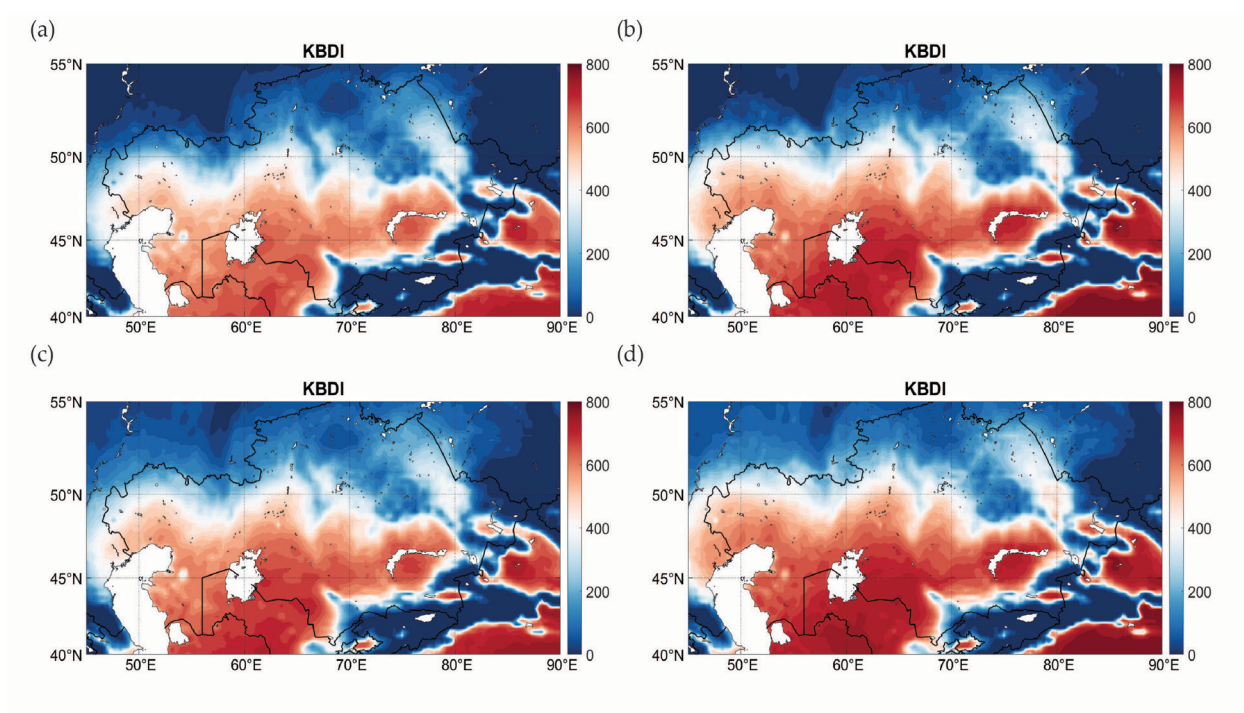

**Figure S1:** The mean spatial distributions of the KBDI index over Kazakhstan in spring (MAM, upper panel) and summer (JJA, bottom panel) for periods 1979-2000 (left column) and 2001-2021 (right column).

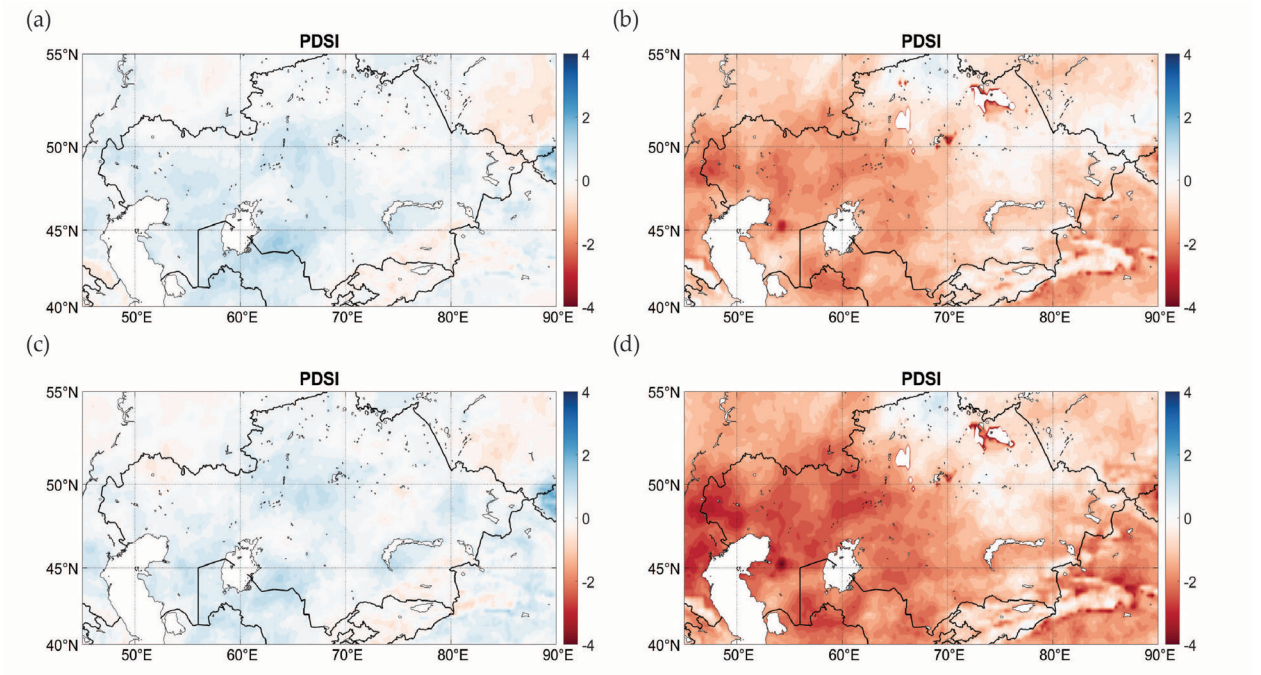

**Figure S2:** The mean spatial distributions of the PDSI index over Kazakhstan in spring (MAM, upper panel) and summer (JJA, bottom panel) for periods 1979-2000 (left column) and 2001-2021 (right column).

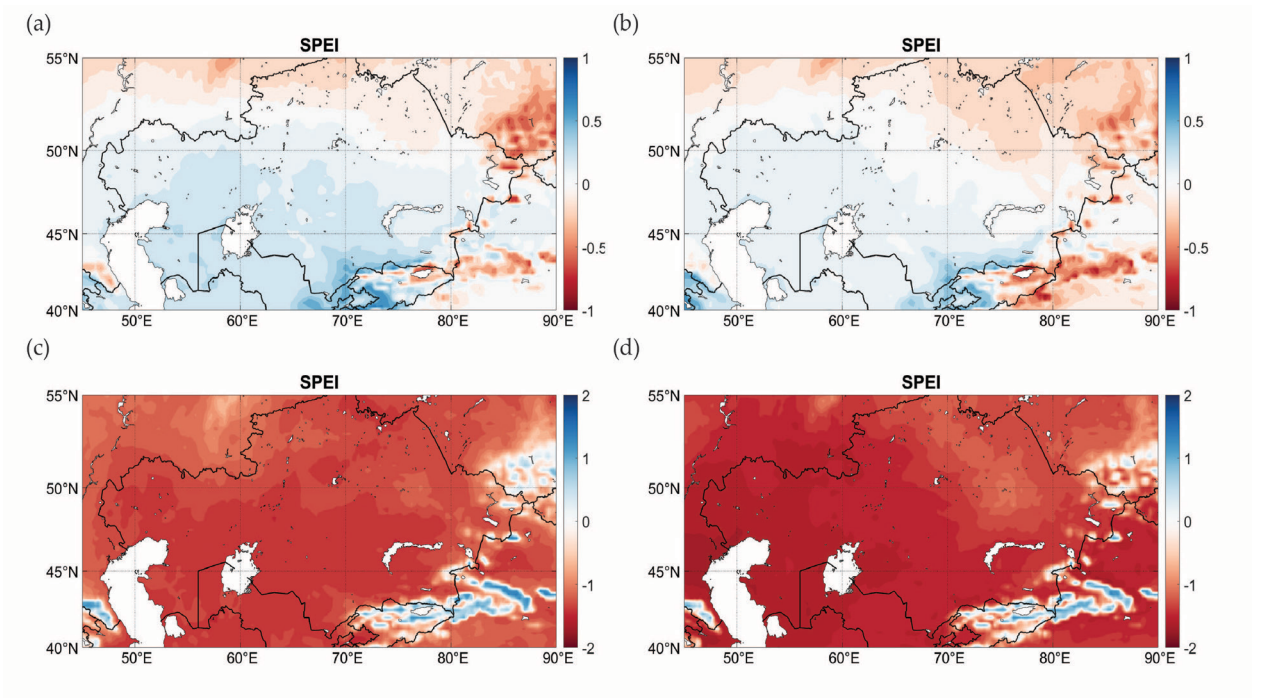

**Figure S3:** The mean spatial distributions of the SPEI index over Kazakhstan in spring (MAM, upper panel) and summer (JJA, bottom panel) for periods 1979-2000 (left column) and 2001-2021 (right column).

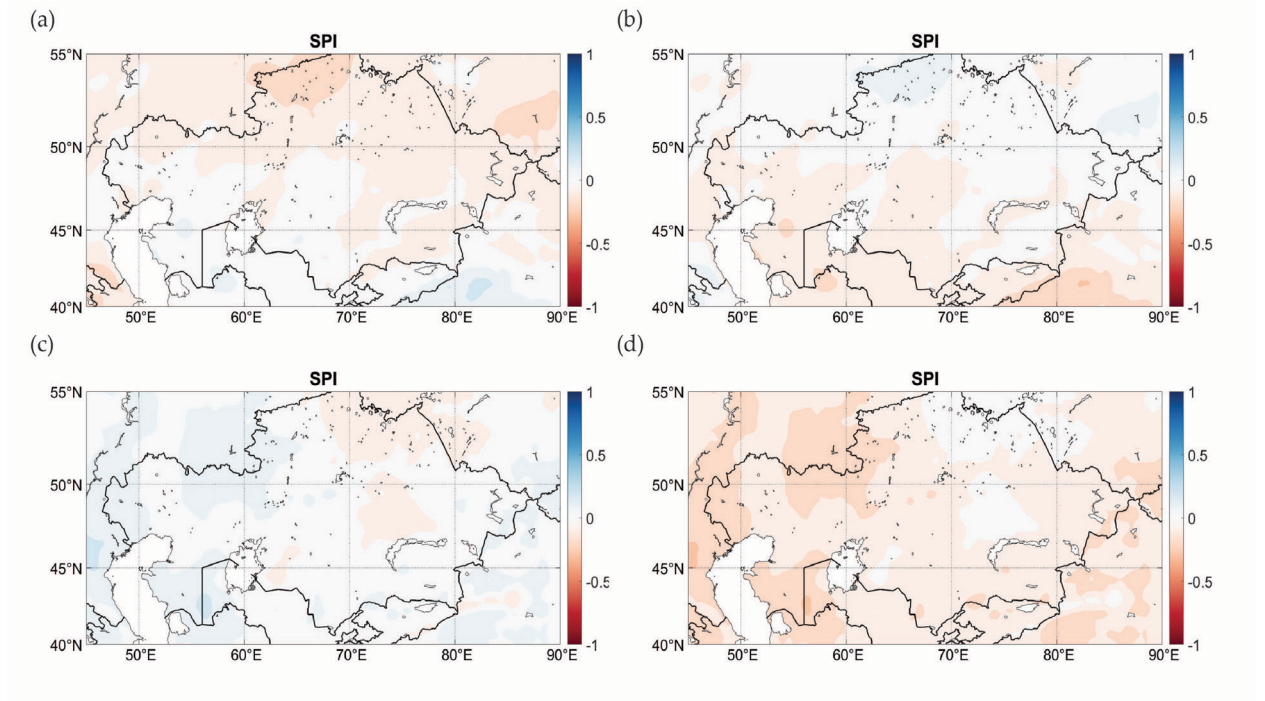

**Figure S4:** The mean spatial distributions of the SPI index over Kazakhstan in spring (MAM, upper panel) and summer (JJA, bottom panel) for periods 1979-2000 (left column) and 2001-2021 (right column).
